# Supplementary material for: Individual, Social, and Environmental Correlates of Active Transportation Patterns in French Women
Source: Hindawi journal article supplement (doi:10.1155/2017/9069730), 2017-01-01
Supplement: f1 [file 9069730.f1.pdf]

**Supplementary Table 1: Description of the socio-ecological variables**

| VARIABLES                                              | QUESTIONS, ANSWERS AND ITEMS*                                                                                                                                                                                                                                                                                                                                                                                                                                                                                    | COMPUTATION OF THE VARIABLE              | CATEGORICAL VARIABLES' THRESHOLDS                                                                       |
|--------------------------------------------------------|------------------------------------------------------------------------------------------------------------------------------------------------------------------------------------------------------------------------------------------------------------------------------------------------------------------------------------------------------------------------------------------------------------------------------------------------------------------------------------------------------------------|------------------------------------------|---------------------------------------------------------------------------------------------------------|
| <i>Perceived residential environment attributes</i>    |                                                                                                                                                                                                                                                                                                                                                                                                                                                                                                                  |                                          |                                                                                                         |
| Availability of destination<br>( <i>high vs. low</i> ) | <u>Around your home you have access to: (multiple choice)</u><br><input type="checkbox"/> A small supermarket<br><input type="checkbox"/> A grocery store<br><input type="checkbox"/> A bank<br><input type="checkbox"/> A post office<br><input type="checkbox"/> A school<br><input type="checkbox"/> A bakery<br><input type="checkbox"/> A restaurant<br><input type="checkbox"/> A cafe terrace<br><input type="checkbox"/> A pharmacy<br><input type="checkbox"/> None of the above                        | Sum of destinations ranking from 0 to 9. | Binary variable categorized at the median value (threshold=7).                                          |
| Ease to walk on sidewalks<br>( <i>high vs. low</i> )   | <u>Among the following proposals, choose the one that best describes how you can walk around your home</u><br>a - You can walk on the sidewalks without being hindered by other pedestrians, cyclists or parked cars.<br>b - You can walk on the sidewalks, but you are sometimes hindered by other pedestrians, cyclists or parked cars.<br>c- On the sidewalks, you are often forced to walk around obstacles or to walk on the road.<br>d - There are no sidewalks around my home<br>e - You're not concerned | -                                        | Binary variable categorized as high (a, b) versus low (c, d).<br>The “e” answer has not been evaluated. |
| Presence of bicycle paths<br>( <i>high vs. low</i> )   | <u>Among the following proposals, choose the one that best describes how it is possible to move by bike around your home</u><br>a - There are bike lanes separated from the road<br>b - There are bike lanes on roads<br>c - You must take the road without bike lanes<br>d - You don't know                                                                                                                                                                                                                     | -                                        | Binary variable categorized as high (a, b) versus low (c).<br>The “d” answer has not been evaluated.    |

|                                                            |                                                                                                                                                                                                              |   |                                                                  |
|------------------------------------------------------------|--------------------------------------------------------------------------------------------------------------------------------------------------------------------------------------------------------------|---|------------------------------------------------------------------|
| Pollution<br>( <i>high vs. low</i> )                       | <u>The neighborhood is polluted:</u><br>a - Strongly agree<br>b - Agree<br>c - Neither agree nor disagree<br>d - Disagree<br>e - Strongly disagree                                                           |   | Binary variable categorized as high (a, b) versus low (c, d, e). |
| Cleanliness of the neighborhood<br>( <i>high vs. low</i> ) | <u>The neighborhood is clean and well:</u><br>a - Strongly agree<br>b - Agree<br>c - Neither agree nor disagree<br>d - Disagree<br>e - Strongly disagree                                                     | - | Binary variable categorized as high (a, b) versus low (c, d, e). |
| Presence of trees<br>( <i>high vs. low</i> )               | <u>There are trees along the streets of the neighborhood:</u><br>a - Strongly agree<br>b - Agree<br>c - Neither agree nor disagree<br>d - Disagree<br>e - Strongly disagree                                  | - | Binary variable categorized as high (a, b) versus low (c, d, e). |
| Presence of green spaces<br>( <i>high vs. low</i> )        | <u>There is one or more green spaces in the neighborhood:</u><br>a - Strongly agree<br>b - Agree<br>c - Neither agree nor disagree<br>d - Disagree<br>e - Strongly disagree                                  | - | Binary variable categorized as high (a, b) versus low (c, d, e). |
| Aesthetics<br>( <i>high vs. low</i> )                      | <u>There are a lot of poorly maintained, unoccupied or ugly buildings in the neighborhood:</u><br>a - Strongly agree<br>b - Agree<br>c - Neither agree nor disagree<br>d - Disagree<br>e - Strongly disagree | - | Binary variable categorized as high (d, e) versus low (a, b, c). |
| Traffic<br>( <i>high vs. low</i> )                         | <u>Your home neighborhood is not safe to walk because of road traffic</u><br>a - Strongly agree<br>b - Agree                                                                                                 |   | Binary variable categorized as high (a, b) versus low (c, d, e). |

|                                                         |                                                                                                                                                                                                                                                                                                                                                                                                                                                                            |                                                                                                                                                          |                                                                   |
|---------------------------------------------------------|----------------------------------------------------------------------------------------------------------------------------------------------------------------------------------------------------------------------------------------------------------------------------------------------------------------------------------------------------------------------------------------------------------------------------------------------------------------------------|----------------------------------------------------------------------------------------------------------------------------------------------------------|-------------------------------------------------------------------|
|                                                         | c - Neither agree nor disagree<br>d - Disagree<br>e - Strongly disagree                                                                                                                                                                                                                                                                                                                                                                                                    |                                                                                                                                                          |                                                                   |
| Criminality<br><i>(high vs. low)</i>                    | <u>During the day, the neighborhood is not safe because of criminality</u><br>a - Strongly agree<br>b - Agree<br>c - Neither agree nor disagree<br>d - Disagree<br>e - Strongly disagree<br><br><u>At night, the neighborhood is not safe because of criminality</u><br>a - Strongly agree<br>b - Agree<br>c - Neither agree nor disagree<br>d - Disagree<br>e - Strongly disagree                                                                                         | Mean of the two item questions ranking from 1 (Strongly agree) to 5 (strongly disagree).<br>(Cronbach's $\alpha=0.82$ )                                  | Binary variable categorized at the median value (threshold=0.2).  |
| <b>Positive representations of transportation modes</b> |                                                                                                                                                                                                                                                                                                                                                                                                                                                                            |                                                                                                                                                          |                                                                   |
| Walking<br><i>(high vs. low)</i>                        | <u>Walking is:</u><br><div> <input type="checkbox"/> Fast Very/Pretty/Not </div> <div> <input type="checkbox"/> Comfortable Very/Pretty/Not </div> <div> <input type="checkbox"/> Cheap Very/Pretty/Not </div> <div> <input type="checkbox"/> Safe, Secure Very/Pretty/Not </div> <div> <input type="checkbox"/> Convenient Very/Pretty/Not </div> <div> <input type="checkbox"/> Relaxing Very/Pretty/Not </div>                                                          | Each item was rated, ranking from 1 (very) to 3 (Not).<br>A score was computed by calculating the average of the 6 items.<br>(Cronbach's $\alpha=0.77$ ) | Binary variable categorized at the median value (threshold=0.53). |
| Cycling<br><i>(high vs. low)</i>                        | <u>Bike is:</u><br><div> <input type="checkbox"/> Fast Very/Pretty/Not </div> <div> <input type="checkbox"/> Comfortable Very/Pretty/Not </div> <div> <input type="checkbox"/> Cheap Very/Pretty/Not </div> <div> <input type="checkbox"/> Safe, Secure Very/Pretty/Not </div> <div> <input type="checkbox"/> Convenient Very/Pretty/Not </div> <div> <input type="checkbox"/> Relaxing Very/Pretty/Not </div> <div> <input type="checkbox"/> Green Very/Pretty/Not </div> | Each item was rated, ranking from 1 (very) to 3 (Not).<br>A score was computed by calculating the average of the 7 items.<br>(Cronbach's $\alpha=0.77$ ) | Binary variable categorized at the median value (threshold=0.53). |
| Individual motorized                                    | <u>Car is:</u>                                                                                                                                                                                                                                                                                                                                                                                                                                                             | Each item was rated, ranking                                                                                                                             | Binary variable categorized                                       |

|                                                       |                                                                                                                                                                                                                                                                                                                                                                                                                                                                                                                                                                                                                                                                                                                                                                                                                                                                                                                                                                                                                                |                                                                                                                                                                                          |                                                                                  |
|-------------------------------------------------------|--------------------------------------------------------------------------------------------------------------------------------------------------------------------------------------------------------------------------------------------------------------------------------------------------------------------------------------------------------------------------------------------------------------------------------------------------------------------------------------------------------------------------------------------------------------------------------------------------------------------------------------------------------------------------------------------------------------------------------------------------------------------------------------------------------------------------------------------------------------------------------------------------------------------------------------------------------------------------------------------------------------------------------|------------------------------------------------------------------------------------------------------------------------------------------------------------------------------------------|----------------------------------------------------------------------------------|
| <p>transportation modes<br/>(<i>high vs. low</i>)</p> | <div> <input type="checkbox"/> Fast<br/> <input type="checkbox"/> Comfortable<br/> <input type="checkbox"/> Cheap<br/> <input type="checkbox"/> Safe, Secure<br/> <input type="checkbox"/> Convenient<br/> <input type="checkbox"/> Relaxing<br/> <input type="checkbox"/> Green </div> <p>Very/Pretty/Not<br/>Very/Pretty/Not<br/>Very/Pretty/Not<br/>Very/Pretty/Not<br/>Very/Pretty/Not<br/>Very/Pretty/Not</p> <p><u>Motorcycle is:</u></p> <div> <input type="checkbox"/> Fast<br/> <input type="checkbox"/> Comfortable<br/> <input type="checkbox"/> Cheap<br/> <input type="checkbox"/> Safe, Secure<br/> <input type="checkbox"/> Convenient<br/> <input type="checkbox"/> Relaxing<br/> <input type="checkbox"/> Green </div> <p>Very/Pretty/Not<br/>Very/Pretty/Not<br/>Very/Pretty/Not<br/>Very/Pretty/Not<br/>Very/Pretty/Not<br/>Very/Pretty/Not</p>                                                                                                                                                             | <p>from 1 (very) to 3 (Not).<br/>A score was computed by<br/>calculating the average of the 14<br/>items.<br/>(Cronbach's <math>\alpha=0.72</math>)</p>                                  | <p>at the median value<br/>(threshold=0.71).</p>                                 |
| <p>Public transport<br/>(<i>high vs. low</i>)</p>     | <p><u>Tram/suburban train/subway is:</u></p> <div> <input type="checkbox"/> Fast<br/> <input type="checkbox"/> Comfortable<br/> <input type="checkbox"/> Cheap<br/> <input type="checkbox"/> Safe, Secure<br/> <input type="checkbox"/> Convenient<br/> <input type="checkbox"/> Relaxing<br/> <input type="checkbox"/> Green<br/> <input type="checkbox"/> Punctual </div> <p>Very/Pretty/Not<br/>Very/Pretty/Not<br/>Very/Pretty/Not<br/>Very/Pretty/Not<br/>Very/Pretty/Not<br/>Very/Pretty/Not<br/>Very/Pretty/Not</p> <p><u>Bus is:</u></p> <div> <input type="checkbox"/> Fast<br/> <input type="checkbox"/> Comfortable<br/> <input type="checkbox"/> Cheap<br/> <input type="checkbox"/> Safe, Secure<br/> <input type="checkbox"/> Convenient<br/> <input type="checkbox"/> Relaxing<br/> <input type="checkbox"/> Green<br/> <input type="checkbox"/> Punctual </div> <p>Very/Pretty/Not<br/>Very/Pretty/Not<br/>Very/Pretty/Not<br/>Very/Pretty/Not<br/>Very/Pretty/Not<br/>Very/Pretty/Not<br/>Very/Pretty/Not</p> | <p>Each item was rated, ranking<br/>from 1 (very) to 3 (Not).<br/>A score was computed by<br/>calculating the average of the 16<br/>items.<br/>(Cronbach's <math>\alpha=0.87</math>)</p> | <p>Binary variable categorized<br/>at the median value<br/>(threshold=0.71).</p> |

| Relatives and friends' use of active transportation modes                     |                                                                                                                                                                                                                                                                                                                                                                                                                                                                                                                                                                                                                                                                                                                                                                                                               |                                                                                                                         |                                                                  |
|-------------------------------------------------------------------------------|---------------------------------------------------------------------------------------------------------------------------------------------------------------------------------------------------------------------------------------------------------------------------------------------------------------------------------------------------------------------------------------------------------------------------------------------------------------------------------------------------------------------------------------------------------------------------------------------------------------------------------------------------------------------------------------------------------------------------------------------------------------------------------------------------------------|-------------------------------------------------------------------------------------------------------------------------|------------------------------------------------------------------|
| Family's use of walking/cycling for transportation<br>( <i>high vs. low</i> ) | <p><u>In your family, most of the adults use bike to reach their activities locations (work, study, shopping, visits, cinema, concert, bar, restaurant, ...):</u></p> <p><input type="checkbox"/> Strongly agree<br/> <input type="checkbox"/> Agree<br/> <input type="checkbox"/> Neither agree nor disagree<br/> <input type="checkbox"/> Disagree<br/> <input type="checkbox"/> Strongly disagree</p> <p><u>In your family, most of the adults walk to reach their activities locations (work, study, shopping, visits, cinema, concert, bar, restaurant, ...):</u></p> <p><input type="checkbox"/> Strongly agree<br/> <input type="checkbox"/> Agree<br/> <input type="checkbox"/> Neither agree nor disagree<br/> <input type="checkbox"/> Disagree<br/> <input type="checkbox"/> Strongly disagree</p> | Mean of the two item questions ranking from 1 (Strongly agree) to 5 (strongly disagree).<br>(Cronbach's $\alpha=0.58$ ) | Binary variable categorized at the median value (threshold=0.3). |
| Friends' use of walking/cycling for transportation<br>( <i>high vs. low</i> ) | <p><u>Most of your friends use bike to reach their activities locations (work, study, shopping, visits, cinema, concert, bar, restaurant, ...):</u></p> <p><input type="checkbox"/> Strongly agree<br/> <input type="checkbox"/> Agree<br/> <input type="checkbox"/> Neither agree nor disagree<br/> <input type="checkbox"/> Disagree<br/> <input type="checkbox"/> Strongly disagree</p> <p><u>Your friends walk to reach their activities locations (work, study, shopping, visits, cinema, concert, bar, restaurant, ...):</u></p> <p><input type="checkbox"/> Strongly agree<br/> <input type="checkbox"/> Agree<br/> <input type="checkbox"/> Neither agree nor disagree<br/> <input type="checkbox"/> Disagree<br/> <input type="checkbox"/> Strongly disagree</p>                                     | Mean of the two item questions ranking from 1 (Strongly agree) to 5 (strongly disagree).<br>(Cronbach's $\alpha=0.76$ ) | Binary variable categorized at the median value (threshold=0.3). |

| <b>Representation of physical activity</b>        |                                                                                                                                                                                                                      |   |                                                                     |
|---------------------------------------------------|----------------------------------------------------------------------------------------------------------------------------------------------------------------------------------------------------------------------|---|---------------------------------------------------------------------|
| Self-representation of an active person           | Do you consider yourself as a physically active person:<br><input type="checkbox"/> Yes<br><input type="checkbox"/> No                                                                                               | - | Binary variable                                                     |
| Family representation of physical activity/sports | Did you grow up in a family how valued physical activity and more particularly sport and exercise<br><input type="checkbox"/> Yes, a lot<br><input type="checkbox"/> Yes a little bit<br><input type="checkbox"/> No | - | Binary variables categorized as high (Yes, a lot) versus low (else) |

**Supplementary Table 2: Unadjusted associations between perceived environmental, representation of transportation modes, physical activity and clusters of physical activity and sedentary behaviors. Results from multinomial logistic regression model using the cluster 5- active transportation as a reference. (N=23432)**

|                                                                           | Cluster 1                                      | Cluster 2                                         | Cluster 3                           | Cluster 4                                               | Cluster 6                 |
|---------------------------------------------------------------------------|------------------------------------------------|---------------------------------------------------|-------------------------------------|---------------------------------------------------------|---------------------------|
|                                                                           | <i>Active occupation, low<br/>leisure time</i> | <i>Sedentary occupation,<br/>low leisure time</i> | <i>Sedentary<br/>transportation</i> | <i>Sedentary occupation,<br/>high sedentary leisure</i> | <i>Active leisure</i>     |
|                                                                           | OR (CI 99%)                                    | OR (CI 99%)                                       | OR (CI 99%)                         | OR (CI 99%)                                             | OR (CI 99%)               |
| <b>Perception of the residential environment</b>                          |                                                |                                                   |                                     |                                                         |                           |
| Availability of destination ( <i>high vs low</i> )                        | <b>0.46 (0.39 ; 0.54)</b>                      | <b>0.62 (0.53 ; 0.73)</b>                         | <b>0.43 (0.34 ; 0.54)</b>           | 0.82 (0.68 ; 1.01)                                      | <b>0.60 (0.45 ; 0.79)</b> |
| Ease to walk on sidewalks ( <i>high vs low</i> )                          | <b>0.52 (0.43 ; 0.63)</b>                      | <b>0.70 (0.58 ; 0.85)</b>                         | <b>0.47 (0.36 ; 0.61)</b>           | 0.86 (0.68 ; 1.08)                                      | <b>0.45 (0.34 ; 0.62)</b> |
| Presence of bicycle paths ( <i>high vs low</i> )                          | <b>0.45 (0.38 ; 0.53)</b>                      | <b>0.57 (0.49 ; 0.67)</b>                         | <b>0.44 (0.34 ; 0.57)</b>           | <b>0.68 (0.56 ; 0.83)</b>                               | <b>0.49 (0.37 ; 0.66)</b> |
| Perceived pollution ( <i>high vs low</i> )                                | <b>0.59 (0.50 ; 0.69)</b>                      | <b>0.69 (0.59 ; 0.81)</b>                         | <b>0.60 (0.46 ; 0.78)</b>           | 0.88 (0.73 ; 1.07)                                      | <b>0.53 (0.39 ; 0.73)</b> |
| Perceived cleanliness of the neighborhood ( <i>high vs low</i> )          | <b>1.41 (1.18 ; 1.68)</b>                      | <b>1.39 (1.17 ; 1.64)</b>                         | 1.28 (0.98 ; 1.68)                  | 1.18 (0.95 ; 1.45)                                      | <b>1.59 (1.14 ; 2.22)</b> |
| Presence of trees ( <i>high vs low</i> )                                  | 0.92 (0.78 ; 1.09)                             | 0.95 (0.81 ; 1.12)                                | 1.00 (0.80 ; 1.43)                  | 0.92 (0.75 ; 1.12)                                      | 1.07 (0.80 ; 1.43)        |
| Presence of green spaces ( <i>high vs low</i> )                           | 0.91 (0.75 ; 1.11)                             | 0.96 (0.79 ; 1.16)                                | 0.89 (0.66 ; 1.18)                  | 0.84 (0.67 ; 1.05)                                      | 1.12 (0.78 ; 1.59)        |
| Aesthetics ( <i>high vs low</i> )                                         | <b>1.45 (1.22 ; 1.73)</b>                      | <b>1.40 (1.18 ; 1.65)</b>                         | <b>1.49 (1.13 ; 1.97)</b>           | 1.06 (0.86 ; 1.30)                                      | <b>1.68 (1.20 ; 2.35)</b> |
| Traffic ( <i>high vs low</i> )                                            | 1.27 (0.97 ; 1.67)                             | 1.07 (0.97 ; 1.67)                                | <b>1.71 (1.18 ; 2.46)</b>           | 0.96 (0.69 ; 1.34)                                      | 1.22 (0.77 ; 1.91)        |
| Criminality ( <i>high vs low</i> )                                        | <b>0.74 (0.63 ; 0.86)</b>                      | <b>0.83 (0.71 ; 0.96)</b>                         | <b>0.70 (0.56 ; 0.89)</b>           | 1.04 (0.86 ; 1.25)                                      | <b>0.72 (0.55 ; 0.95)</b> |
| <b>Positive representations of transportation modes</b>                   |                                                |                                                   |                                     |                                                         |                           |
| Walking ( <i>high vs low</i> )                                            | <b>0.44 (0.37 ; 0.52)</b>                      | <b>0.48 (0.41 ; 0.57)</b>                         | <b>0.35 (0.26 ; 0.48)</b>           | <b>0.50 (0.40 ; 0.62)</b>                               | 0.79 (0.58 ; 1.07)        |
| BCycling ( <i>high vs low</i> )                                           | <b>0.66 (0.56 ; 0.77)</b>                      | <b>0.61 (0.52 ; 0.72)</b>                         | <b>0.53 (0.42 ; 0.68)</b>           | <b>0.54 (0.44 ; 0.65)</b>                               | 0.80 (0.60 ; 1.06)        |
| Individual motorized transportation modes ( <i>high vs low</i> )          | <b>1.41 (1.20 ; 1.66)</b>                      | <b>1.21 (1.04 ; 1.42)</b>                         | 1.19 (0.93 ; 1.52)                  | <b>1.29 (1.07 ; 1.57)</b>                               | <b>1.59 (1.21 ; 2.09)</b> |
| Public transport ( <i>high vs low</i> )                                   | <b>0.74 (0.63 ; 0.86)</b>                      | 0.90 (0.77 ; 1.05)                                | <b>0.58 (0.46 ; 0.73)</b>           | 0.89 (0.74 ; 1.08)                                      | <b>0.75 (0.57 ; 0.99)</b> |
| <b>Relatives and friends' use of active transportation modes</b>          |                                                |                                                   |                                     |                                                         |                           |
| Family's use of walking/cycling for transportation ( <i>high vs low</i> ) | <b>0.35 (0.29 ; 0.41)</b>                      | <b>0.41 (0.35 ; 0.49)</b>                         | <b>0.30 (0.24 ; 0.39)</b>           | <b>0.45 (0.37 ; 0.55)</b>                               | <b>0.36 (0.27 ; 0.47)</b> |
| Friends' use of walking/cycling for                                       | <b>0.43 (0.37 ; 0.51)</b>                      | <b>0.56 (0.47 ; 0.66)</b>                         | <b>0.37 (0.29 ; 0.47)</b>           | <b>0.61 (0.50 ; 0.74)</b>                               | <b>0.43 (0.33 ; 0.58)</b> |

transportation (*high vs low*)

**Representation of physical activity**

|                                                                  |             |                      |             |                      |             |                      |             |                      |      |               |
|------------------------------------------------------------------|-------------|----------------------|-------------|----------------------|-------------|----------------------|-------------|----------------------|------|---------------|
| Self-representation of an active person (yes vs. no)             | <b>0.64</b> | <b>(0.54 ; 0.76)</b> | <b>0.44</b> | <b>(0.37 ; 0.52)</b> | <b>0.53</b> | <b>(0.42 ; 0.68)</b> | <b>0.28</b> | <b>(0.23 ; 0.34)</b> | 1.18 | (0.86 ; 1.60) |
| Family representation of physical activity/sports (high vs. low) | <b>0.80</b> | <b>(0.64 ; 0.99)</b> | 0.85        | (0.69 ; 1.04)        | 0.93        | (0.67 ; 1.28)        | 0.84        | (0.65 ; 1.08)        | 1.30 | (0.92 ; 1.84) |

---

CI: confidence interval, OR: odds ratio
